# Supplementary material
Source: publisher figshare collection journal article supplement (https://karger.figshare.com/ndownloader/files/26521586)
Supplement: Supplementary file 1 [file 26521586]

**Table S1: Association analysis of incident rhegmatogeneous retinal detachment. Data from the German population-based Gutenberg Health Study (2007-2017).** **Logistic regression analysis.**

| **n= 13.378** | **univariate** | | | **multivariable** | | |
| --- | --- | --- | --- | --- | --- | --- |
| Parameter | OR | 95% CI | P-value | OR | 95% CI | P-value |
| Sex (male) | 3.59 | 1.31; 9.88 | 0.011 | 5.05 | 1.75; 16.7 | 0.003 |
| Age (years) | 1.03 | 0.99 ; 1.07 | 0.10 | 1.03 | 0.97; 1.09 | 0.39 |
| Diabetes (yes) | 0.50 | 0.70; 3.70 | 0.50 | 0.35 | 0.05; 2.61 | 0.30 |
| Job position: |  |  |  |  |  |  |
| Production and manufacturing, raw material extraction | 0.47 | 0.04; 5.23 | 0.54 | 0.14 | 0.01; 1.82 | 0.13 |
| Business organization, accounting, law and administration | 1.29 | 0.26; 6.40 | 0.76 | 0.60 | 0.10; 3.51 | 0.57 |
| Health and education, social affairs, teaching and education | 0.33 | 0.03; 3.62 | 0.36 | 0.18 | 0.02; 2.20 | 0.18 |
| Humanities, media and culture, language, literature, social and economic sciences, art and design | 0.67 | 0.06; 7.42 | 0.75 | 0.28 | 0.02; 3.49 | 0.32 |
| Other | 0.34 | 0.05; 2.43 | 0.35 | 0.12 | 0.01; 0.99 | 0.05 |
| retired | 1.24 | 0.27; 5.69 | 0.78 | 0.36 | 0.06; 2.21 | 0.27 |

**Table S2: Association analysis of incident rhegmatogenous retinal detachment. Data from the German population-based Gutenberg Health Study (2007-2017). Logistic regression analysis with generalized estimating equations to adjust for inter-eye correlations.**

| **n= 26.075 eyes** | **univariate** | | | **multivariable** | | |
| --- | --- | --- | --- | --- | --- | --- |
| Parameter | OR | 95% CI | P-value | OR | 95% CI | P-value |
| Sex (male) | 3.60 | 1.33; 10.0 | 0.01 | 4.14 | 1.45; 12.5 | 0.008 |
| Age (years) | 1.03 | 1.00; 1.07 | 0.07 | 1.04 | 0.99; 1.09 | 0.16 |
| Spherical equivalent (in diopters myopia) | 1.26 | 1.21; 1.32 | <0.0001 | 1.31 | 1.24; 1.39 | <0.0001 |
| Pseudophakia | 6.06 | 2.06; 17.8 | 0.001 | 4.90 | 1.18; 20.3 | 0.03 |
| Retinal laser therapy | 2.72 | 0.37; 20.3 | 0.33 | 0.64 | 0.06; 6.61 | 0.71 |
